# Supplementary material for: The miRNA biogenesis in marine bivalves
Source: PeerJ. 2016 Mar 7;4:e1763. doi: 10.7717/peerj.1763 (PMC4793324; doi:10.7717/peerj.1763)
Supplement: File S1 — Organism ID, project ID (SRA archive), species name and order, origin of the sequenced sample, sequencing platform, millions of reads, number of assembled contig and number of predicted proteins are reported. [file peerj-04-1763-s001.xlsx]

## Sheet: Foglio1
Supplementary File 1. Details of the bivalve transcriptome assemblies. Organism ID, project ID (SRA archive), species name and order, origin of the sequenced sample, sequencing platform, millions of reads, number of assembled contig and number of predicted proteins are reported.
ID	Project ID	Species	Order	Sample type	Sequencing platform	Read no. [M]	Contig No.	No. of predicted proteins
anatra	PRJNA210944	Anadara trapezia	Arcoida	Mixed tissues	illumina	13.1	42 924	22 528
teggra	PRJNA159979	Tegillarca granosa	Arcoida	Mixed tissues	Illumina	1.2	22 744	11 532
batazo	PRJNA79785	Bathymodiolus azoricus	Mytiloida	Gills	454	0.6	22 914	5 780
mytcal	PRJNA249058	Mytilus californianus	Mytiloida	Mixed tissues	illumina	38.8	84 012	27 275
mytedu	PRJNA252953/PRJNA249058	Mytilus edulis	Mytiloida	Mixed tissues	illumina	390.7	229 951	67 730
mytgal	PRJNA88481	Mytilus galloprovincialis	Mytiloida	Mixed tissues	illumina	205.1	284 182	81 961
myttro	PRJNA249058	Mytilus trossolus	Mytiloida	Mixed tissues	illumina	57.5	126 144	38 592
pervir	PRJNA254094	Perna viridis	Mytiloida	Mixed tissues	Ilumina	281	87 853	30 362
ennten	\	Ennucula tenuis	Nuculoida	Not specified	Illumina	8.1	68 090	28 466
cracor	PRJNA237222	Crassostrea corteziensis	Ostreoida	Not specified	Illumina	13.5	64 284	28 853
cragig	\	Crassostrea gigas	Ostreoida	Mixed tissues	Illumina	2,995	388 000	26 869
crahon	PRJNA223230	Crassostrea hongkongensis	Ostreoida	Mixed tissues	Illumina	24.7	47 357	27 424
cravir	PRJNA82611	Crassostrea virginica	Ostreoida	Not specified	Illumina	4.8	50 802	29 664
craang	PRJNA24021	Crassostrea angulata	Ostreoida	Muscle	Illumina	44.8	41 686	25 508
ostchil	PRJNA249058	Ostrea chilensis	Ostreoida	Mixed tissues	Illumina	8.1	18 770	10 774
ostedu	PRJNA249058	Ostrea edulis	Ostreoida	Mixed tissues	illumina	46.7	57 360	22 124
ostlur	PRJNA171849	Ostrea lurida	Ostreoida	Larvae	Illumina	388.5	41 206	16 537
ostste	PRJNA249058	Ostreola stentina	Ostreoida	Mixed tissues	Illumina	8.2	12 206	5 690
sacglo	PRJNA253158	Saccostrea glomerata	Ostreoida	Mixed tissues	454	0.8	53 280	21 178
argirr	PRJNA237853	Argopecten irradians	Pectinoida	Mixed tissues	illumina	76.3	33 994	20 556
mizyes	PRJNA186890	Mizuhopecten yessoensis	Pectinoida	Mixed tissues	Illumina	94.7	117 295	31 182
pecmax	PRJNA222492	Pecten maximus	Pectinoida	Hemolymph	illumina	108.2	37 485	18 440
solvel	\	Solemya velum	Solemyoida	Not specified	illumina	33.3	51 268	20 777
neomar	PRJNA249058	Neotrigonia margaritacea	Trigoniida	Foot	illumina	24.1	55 140	15 684
elicom	PRJNA194430	Elliptio complanata	Unionoida	Not specified	454	\	89 063	24 524
pyggra	\	Pyganodon grandis	Unionoida	Muscle	illumina	100.5	86 957	23 128
unitet	\	Uniomerus tetralasmus	Unionoida	Muscle	illumina	113.1	123 694	26 434
villie	PRJNA75063	Villosa lienosa	Unionoida	Not specified	illumina	81.5	125 347	28 113
corflu	PRJNA183608	Corbicula fluminea	Veneroida	Mixed tissues	illumina	33.5	27 804	14 501
mermer	PRJNA257120	Meretrix meretrix	Veneroida	Mantle	illumina	56.6	41 719	21 594
ruddec	PRJNA218511	Ruditapes decussatus	Veneroida	Gonad	illumina	171.2	88 151	34 218
rudphi	PRJNA234093	Ruditapes philippinarum	Veneroida	Mixed tissues	Illumina	56.2	68 215	22 854
