# Supplementary material for: The miRNA biogenesis in marine bivalves
Source: PeerJ. 2016 Mar 7;4:e1763. doi: 10.7717/peerj.1763 (PMC4793324; doi:10.7717/peerj.1763)
Supplement: File S2 [file peerj-04-1763-s002.xlsx]

## Sheet: Foglio1
Supplementary File 2. Details on the analyzed oyster and mussel RNA-seq samples. Tissue, SRA ID, description and number of reads (in million) are reported.
Sample type	SRA ID	Description	M reads
Crassostrea gigas
Tissues	SRR334212	outer edge of mantle	33.8
	SRR334213	digestive gland	37.2
	SRR334214	female gonad	34.4
	SRR334215	gill	39.1
	SRR334216	inner part of mantle	41.9
	SRR334217	adductor muscle	38.4
	SRR334218	hemolymph	33.3
	SRR334219	labial palp	52.4
	SRR334220	male gonad	54.8
Biotic stimuli	SRR796582	0h after Vibrio challenge	16.66
	SRR796583	6h after Vibrio challenge	17.09
	SRR796584	12h after Vibrio challenge	16.1
	SRR796585	24h after Vibrio challenge	17.19
	SRR796586	48h after Vibrio challenge	17.45
	SRR796589	Control-1, no injection	14.98
	SRR796591	Control-2, challenge 12h with PBS	14.49
	SRR796592	Challenge 12h with LPS	13.61
	SRR796593	Challenge 12h with V. aestuarianus	15.59
	SRR796594	Challenge 12h with V. anguillarum	15.07
	SRR796595	Challenge 12h with V. alginolyticus-1	14.8
	SRR796596	Challenge 12h with V. alginolyticus-2	15.17
	SRR796597	Challenge 12h with V. tubiashii	13.47
	SRR796598	Challenge 12h with Micrococcus luteus	15.68
Developmetal stages	SRR334222	developmental stage egg	10.4
	SRR334223	developmental stage two cells	10.6
	SRR334224	developmental stage four cells	10.7
	SRR334225	developmental stage early morula stage	28.5
	SRR334226	developmental stage morula stage	23
	SRR334227	developmental stage blastula stage	21.3
	SRR334228	developmental stage rotary movement	23.1
	SRR334229	developmental stage free swimming	21.2
	SRR334230	developmental stage early gastrula stage	22.3
	SRR334231	developmental stage gastrula stage	11.4
	SRR334232	developmental stage trochophore1	15.6
	SRR334233	developmental stage trochophore2	12.5
	SRR334234	developmental stage trochophore3	12.1
	SRR334235	developmental stage trochophore4	10
	SRR334236	developmental stage trochophore5	11.6
	SRR334237	developmental stage early Dshaped larva1	11.1
	SRR334238	developmental stage early Dshaped larva2	11.9
	SRR334239	developmental stage Dshaped larva1	10.3
	SRR334240	developmental stage Dshaped larva2	11.2
	SRR334241	developmental stage Dshaped larva3	10.9
	SRR334242	developmental stage Dshaped larva4	10.9
	SRR334243	developmental stage Dshaped larva5	10.5
	SRR334244	developmental stage Dshaped larva6	26.7
	SRR334245	developmental stage Dshaped larva7	16.4
	SRR334246	developmental stage early umbo larva1	22.6
	SRR334247	developmental stage early umbo larva2	10.3
	SRR334248	developmental stage umbo larva1	24.1
	SRR334249	developmental stage umbo larva2	26.6
	SRR334250	developmental stage umbo larva3	11.7
	SRR334251	developmental stage umbo larva4	26.4
	SRR334252	developmental stage umbo larva5	10.9
	SRR334253	developmental stage umbo larva6	10.6
	SRR334254	developmental stage later umbo larva1	20.4
	SRR334255	developmental stage later umbo larva2	10.3
	SRR334256	developmental stage competent pediveliger for metamorphosis	10.6
	SRR334257	developmental stage competent pediveliger for metamorphosis	16.1
	SRR334258	developmental stage spat	14.9
	SRR334259	developmental stage juvenile	17
	E-MTAB-2552	spat highly infected with OsHV-1	85.3
Abiotic stimuli	SRR334262	gills, sampled at time 7d, 5ºC	17.2
	SRR334263	gills, sampled at time 7d, 10ºC	16.5
	SRR334264	gills, sampled at time 7d, 15ºC	15.3
	SRR334265	gills, sampled at time 7d, 20ºC	15.7
	SRR334266	gills, sampled at time 7d, 25ºC	18.3
	SRR334267	gills, sampled at time 12h, 30ºC	17.3
	SRR334268	gills, sampled at time 12h, 35ºC	17.6
	SRR334269	gills, sampled at time 12h, salinity 5 ppt	18.3
	SRR334270	gills, sampled at time 12h, salinity 10 ppt	16.3
	SRR334271	gills, sampled at time 12h, salinity 15 ppt	15
	SRR334272	gills, sampled at time 12h, salinity 20 ppt	15.4
	SRR334273	gills, sampled at time 12h, salinity 25 ppt	15.5
	SRR334274	gills, sampled at time 12h, salinity 30 ppt	14.8
	SRR334275	gills, sampled at time 12h, salinity 40 ppt	14.6
	SRR334276	gills, sampled at time 1d, exposure to air	17.2
	SRR334277	gills, sampled at time 3d, exposure to air	18.2
	SRR334278	gills, sampled at time 5d, exposure to air	16.4
	SRR334279	gills, sampled at time 7d, exposure to air	16.6
	SRR334280	gills, sampled at time 9d, exposure to air	17.2
	SRR334281	gills, sampled at time 10d, exposure to air	18
	SRR334282	gills, sampled at time 11d, exposure to air	19.4
	SRR334283	adductor muscles, sampled at time 0d, exposure to air	18.8
	SRR334284	adductor muscles, sampled at time 1d, exposure to air	15.6
	SRR334285	adductor muscles, sampled at time 3d, exposure to air	18.3
	SRR334286	adductor muscles, sampled at time 5d, exposure to air	15.3
	SRR334287	adductor muscles, sampled at time 7d, exposure to air	16.4
	SRR334288	adductor muscles, sampled at time 9d, exposure to air	16.7
	SRR334289	adductor muscles, sampled at time 10d, exposure to air	15.3
	SRR334290	adductor muscles, sampled at time 11d, exposure to air	16.7
	SRR334291	gills, sampled at time 12h, Zn	15.9
	SRR334292	gills, sampled at time 12h, Pb	16.3
	SRR334293	gills, sampled at time 12h, Cu	16.8
	SRR334294	gills, sampled at time 12h, Hg	17.1
	SRR334295	gills, sampled at time 12h, Cd	17
	SRR334296	gills, sampled at time 12h, Zn & Cd	15
	SRR334297	digestive glands, sampled at time 12h, Pb	15.4
	SRR334298	digestive glands, sampled at time 12h, Cu	15.9
	SRR334299	digestive glands, sampled at time 12h, Hg	16.8
	SRR334300	digestive glands, sampled at time 12h, Cd	14
	SRR334301	digestive glands, sampled at time 12h, Zn & Cd	14.8
	SRR334302	gills, sampled at time 9d, Pb	15.9
	SRR334303	gills, sampled at time 9d, Cu	18.5
	SRR334304	gills, sampled at time 9d, Hg	18.7
	SRR334305	digestive glands, sampled at time 9d, Pb	15.3
	SRR334306	digestive glands, sampled at time 9d, Cu	15.6
	SRR334307	digestive glands, sampled at time 9d, Hg	18.4
	SRR334308	gills, sampled at time 9d, Cd	16.8
	SRR334309	gills, sampled at time 9d, Zn & Cd	15.8
	SRR334310	digestive glands, sampled at time 9d, Cd	15.3
	SRR334311	digestive glands, sampled at time 9d, Zn & Cd	16.3
	SRR334312	gills, with no metals challenge	17.1
	SRR334313	digestive glands, with no metals challenge	17.5
	SRR334314	digestive glands, sampled at time 12h, Zn	16.2
	SRR334315	digestive glands, sampled at time 5d, Zn	16.3
	SRR334316	digestive glands, sampled at time 7d, Zn	17.4
	SRR334317	digestive glands, sampled at time 9d, Zn	15.5
	SRR334318	digestive glands, sampled at time 13d, Zn	16.5
	SRR334319	gills, sampled at time 5d, Zn	16.3
	SRR334320	gills, sampled at time 7d, Zn	16.3
	SRR334321	gills, sampled at time 9d, Zn	15
	SRR334322	gills, sampled at time 13d, Zn	16.3
Sample type	SRA ID	Description	M reads
Mytilus galloprovincialis
Tissues	SRR1046119	gill	53.3
	SRR442031	digestive gland	6.6
	SRR442032	digestive gland	17.8
	SRR442033	digestive gland	15.8
	SRR442034	digestive gland	16.9
	SRR442035	digestive gland	13.3
	SRR442036	digestive gland	8.9
	SRR1045900	hemolymph	54.8
	SRR1042397	hemolymph	52.6
	SRR1046117	mantel	55
	SRR1046118	mantel	52.1
	SRR1046115	muscle	54.1
	SRR1046116	muscle	52
