# Supplementary material for: The miRNA biogenesis in marine bivalves
Source: PeerJ. 2016 Mar 7;4:e1763. doi: 10.7717/peerj.1763 (PMC4793324; doi:10.7717/peerj.1763)
Supplement: File S6 — Digital Expression values of the miRNA biogenesis genes measured by RNA-seq analysis for Mg and Cg (expressed as percentage of El1a). [file peerj-04-1763-s006.xlsx]

## Sheet: Mg
Supplementary File 6. Digital Expression values of the miRNA biogenesis genes measured by RNA-seq analysis for Mg (expressed as percentage of El1a).
NCBI ID	description	G1	DG1	DG2	DG3	DG4	DG5	DG6	HAE1	HAE2	MAN1	MAN2	MUS1	MUS2
KT447251	DROSHA	0.0605345	0.00485515	0.135769	0.010383	0.144013	0	0.0045976	0.0317534	0.0303723	0.20801	0.212563	0.13441	0.203147
KT447252	DGCR8	0.0584968	0.00427998	0.125721	0.0122112	0.104885	0.00616744	0	0.0689496	0.109553	0.164942	0.307754	0.105565	0.181687
KT447259	XPO5	0.0884947	0.0246818	0.09554	0.0221803	0.112014	0.0118605	0	0.0161911	0.0351018	0.145319	0.189378	0.0981459	0.129184
KT447254	RAN	3.88482	4.05774	6.58086	3.25714	7.00532	1.74733	2.79154	4.20027	7.09891	11.6529	17.4196	9.88693	14.2755
KT447258	DICER	0.0256169	0.00353563	0.0688046	0.0109349	0.0708623	0	0.0183904	0.00398882	0.00896033	0.0556066	0.082142	0.0281795	0.0488836
KT447253	TARBP2	0.167936	0.235094	0.232879	0.111867	0.139683	0.148218	0.00555446	0.0208283	0.0564105	0.34509	0.316983	0.243069	0.247918
KT447257	AGO	0.0602142	0.0159188	0.58953	0.00757166	0.567567	0.00229719	0.0421952	0.0225771	0.0955196	0.260321	0.444031	0.113982	0.135199
KT447255	PIWI	0.180526	0.221544	0.705383	0.0771827	0.931366	0.00853954	0.0224512	0.0352706	0.105495	1.51703	1.18135	0.470285	0.358667
KT447256	PIWI2	0.068205	0.0353902	0.229686	0.0126252	0.201516	0.0021224	0.265121	0.0307316	0.115212	0.576793	0.594885	0.114864	0.115523
KT694355	CNOT1	0.870378	0.209651	2.53455	0.150571	2.44255	0.0741092	0.101054	0.595415	0.70797	2.86793	3.27368	1.37429	2.32767
KT694356	CNOT10	0.717346	0.478275	1.61996	0.308162	1.56501	0.0466678	0.0848573	0.468736	0.692749	2.58609	2.08397	1.8912	1.99903
KT694357	CNOT2	0.265455	0.40587	0.562921	0.228219	0.703307	0.132937	0.0232681	0.182287	0.254157	0.681399	0.763099	0.791455	0.811856
KT694358	CNOT3	0.156525	0.133948	0.62018	0.0613667	0.69632	0.0143075	0.00469095	0.20567	0.286387	0.999321	1.00171	0.562126	0.736466
KT694359	CNOT6	0.154633	0.0737915	0.52372	0.035116	0.557165	0.00294639	0.0543077	0.136504	0.734059	0.765954	0.986006	0.594548	0.773677
KT694360	CNOT7	0.132713	0.0592261	0.695966	0.101467	0.439888	0	0.0112023	0.00381198	0.014223	0.271097	0.275308	0.193331	0.188194
KT694361	CNOT9	1.08979	1.19218	2.01253	1.89262	1.95801	0.801168	0.509797	1.51192	1.63986	3.61382	3.7145	3.05909	3.44743
KT694362	DCP1	0.031861	0	0.270366	0.0125562	0.274314	0.00474419	0	0.0063664	0.00791123	0.0625595	0.128703	0.0305749	0.0198797
KT694363	DCP2	0.0939965	0.0890336	0.226673	0.0924122	0.228393	0.0291643	0.0229647	0.339875	0.229821	0.614095	0.484402	0.606359	0.563037
KT694373	DDX20	0.0779277	0.0173567	0.217454	0.0192827	0.163339	0	0.00548445	0.106303	0.0918219	0.596004	0.780381	0.354207	0.426428
KT694374	DDX42	0.14721	0.0290294	0.271069	0.0598662	0.323421	0.00696646	0.0778325	0.0514617	0.0477426	0.34168	0.318272	0.305117	0.33002
KT694371	DDX5	10.0565	1.63062	14.7019	1.63305	16.0871	0.0263927	0.398731	7.46851	12.7489	24.3392	29.1953	15.2839	28.8594
KT694372	DDX6	0.127095	0.103718	0.980962	0.0531396	0.959792	0.0172539	0	0.0179988	0.068071	0.538074	0.643642	0.229312	0.386753
KT694364	eIF4G	0.404529	0.139734	1.32919	0.116852	1.39468	0.0137332	0.320549	0.665387	0.780203	1.36329	1.9296	1.07819	1.22301
KT447250	GW182	0.390323	0.305604	1.57329	0.24983	1.64641	0.0540588	0.155105	0.625125	0.537792	1.75247	2.50819	1.00774	1.31335
KT694366	MAEL	0.109934	0.175361	0.107807	0.0750957	0.279982	0.0379036	0.00828502	0.176098	0.123897	0.314148	0.72467	0.305683	0.417847
KT694365	PABP	0.0510882	0	0.119641	0.018817	0.054546	0.0529102	0	0	0	0	0	0	0
KT694367	PAN2	0.345275	0.132612	0.867635	0.106555	0.77035	0.0339834	0.00277723	0.399118	0.398778	1.63885	1.73276	1.65534	3.52395
KT694368	PAN3	0.279355	0.118368	0.665587	0.0779933	0.551128	0.0131339	0.021541	0.00782045	0.0151689	0.437307	0.494093	0.23219	0.294287
KT694369	PRMT5	0.104432	0.134726	0.256926	0.0507422	0.154239	0	0.0159399	0.0434055	0.0755867	0.477492	0.530438	0.142628	0.216791

## Sheet: Cg
Supplementary File 6. Digital Expression values of the miRNA biogenesis genes measured by RNA-seq analysis for Cg (expressed as percentage of El1a).
ID	Annotation	G_334215	G_796583	G_796584	G_796585	G_796586	G_796589	G_796591	G_796592	G_796593	G_796594	G_796595	G_796596	G_796597	G_796598	G_796582	G_334262	G_334263	G_334264	G_334265	G_334266	G_334267	G_334268	G_334269	G_334270	G_334271	G_334272	G_334273	G_334274	G_334275	G_334276	G_334277	G_334278	G_334279	G_334280	G_334281	G_334282	G_334291	G_334292	G_334293	G_334294	G_334295	G_334296	G_334302	G_334303	G_334304	G_334308	G_334309	G_334312
CGI_10012474	EL1a	9110.23	9028.01	8103.55	8868.31	9274.74	6814.84	7315.45	8610.94	8444.7	8217.18	8306.5	10168	8163.07	7159.07	8189.86	8470.58	6390.23	6367.12	7191.73	7364.95	8085.2	8094.6	5949.57	6054.71	7173.55	7672.24	6643.49	6894.48	7761.21	7353.72	8625.14	6729.28	8149.75	8152.22	9138.79	8830.61	6875.73	7067.05	6998.07	7677.78	8800.64	7537.87	7538.43	8115.97	8445.06	7616.87	7583.83	7429.9
CGI_10005763	DROSHA	0.196482	0.383584	0.283333	0.315167	0.366587	0.473525	0.420753	0.513533	0.315583	0.324077	0.368747	0.22384	0.310667	0.375887	0.332484	0.259604	0.362428	0.413845	0.344145	0.369996	0.289789	0.302671	0.5513	0.36484	0.473824	0.377074	0.499737	0.335486	0.30034	0.371921	0.234083	0.302113	0.312893	0.208777	0.229352	0.197155	0.415956	0.526245	0.494851	0.429421	0.328953	0.451454	0.372624	0.28179	0.294965	0.325724	0.293915	0.415887
CGI_10006425	DGCR8	0.0729949	0.183761	0.275805	0.193949	0.210895	0.391499	0.31618	0.20834	0.1781	0.194957	0.143502	0.0569436	0.226753	0.268052	0.260932	0.424174	0.544268	0.336259	0.341921	0.271421	0.335551	0.48205	0.655846	0.395064	0.213423	0.235915	0.335516	0.223947	0.240813	0.408773	0.261561	0.404501	0.203442	0.274281	0.235261	0.266573	0.469768	0.52483	0.555296	0.505745	0.444627	0.548431	0.257879	0.217226	0.209708	0.279642	0.250665	0.337959
CGI_10015093	DICER	0.0957166	0.0889454	0.122662	0.0956214	0.0786006	0.137201	0.157065	0.113809	0.108115	0.104902	0.0976344	0.0677619	0.114418	0.107975	0.107328	0.0846459	0.159462	0.163025	0.148226	0.138765	0.194058	0.12008	0.15665	0.104051	0.0979989	0.166314	0.154738	0.137066	0.105911	0.126331	0.0635352	0.165099	0.0923955	0.0706556	0.0770343	0.0895748	0.137731	0.136549	0.191053	0.117091	0.123627	0.120591	0.14446	0.117423	0.108584	0.145073	0.141353	0.156261
CGI_10016070	TARBP2	0.130403	0.171023	0.0965009	0.164744	0.130678	0.236102	0.205729	0.140287	0.106102	0.142993	0.100403	0.0327499	0.163541	0.202121	0.141639	0.0755556	0.174485	0.0987888	0.176592	0.113375	0.0800228	0.179008	0.180853	0.108511	0.0740219	0.0954089	0.169489	0.197259	0.133871	0.130682	0.0963463	0.0959984	0.0635602	0.0545864	0.0610584	0.0740606	0.0952626	0.108532	0.169047	0.144573	0.209303	0.15243	0.111694	0.118778	0.128359	0.115402	0.080698	0.100001
CGI_10008155	AGO	0.794272	0.651085	0.831117	0.670816	0.614033	0.83685	0.804462	0.726053	0.651888	0.740157	0.790947	0.487315	0.749718	0.814072	0.671928	0.497132	0.979151	1.00815	0.978207	0.864364	0.619651	0.517629	0.770812	0.818867	0.828739	0.713481	1.00023	0.935241	0.731329	0.681016	0.354893	0.743467	0.559894	0.555186	0.497659	0.53224	0.79497	0.728451	0.750921	0.72013	0.561777	0.646469	0.898463	0.676074	0.713435	0.852975	0.913786	0.81347
CGI_10020511	AGO	0.582642	0.566459	0.614916	0.4913	0.420928	0.70053	0.80993	0.662878	0.52601	0.577327	0.630952	0.382869	0.564126	0.674389	0.579131	0.337521	0.762883	0.720577	0.569404	0.574749	0.600975	0.48835	0.631642	0.486068	0.73297	0.493467	0.61263	0.604397	0.494897	0.484109	0.273619	0.721177	0.507132	0.585975	0.517027	0.614001	0.757301	0.705952	0.649179	0.573082	0.640294	0.60866	0.71036	0.490022	0.513199	0.576352	0.601411	0.639982
CGI_10014604	PIWL2	0.161577	0.191847	0.191398	0.185379	0.160759	0.254151	0.239083	0.204043	0.159271	0.203963	0.215855	0.156865	0.135611	0.22014	0.200492	0.207542	0.22284	0.329034	0.231377	0.276988	0.191337	0.229289	0.282878	0.222471	0.220951	0.170876	0.287951	0.254987	0.202417	0.241918	0.173562	0.22781	0.196202	0.139103	0.167309	0.160918	0.379741	0.188622	0.262215	0.194327	0.229302	0.213986	0.231215	0.223264	0.202604	0.258243	0.253961	0.282373
CGI_10008757	PIWL1	0.560359	0.311918	0.452765	0.514303	0.337476	0.450194	0.546378	0.348278	0.332872	0.438715	0.351171	0.391721	0.312872	0.468636	0.56631	0.233042	0.406402	0.452324	0.387389	0.360355	0.318483	0.318731	0.429275	0.37508	0.363418	0.368471	0.344999	0.397855	0.368628	0.407141	0.262257	0.485044	0.297432	0.219449	0.192367	0.212669	0.314876	0.35715	0.444408	0.282634	0.264185	0.29186	0.342512	0.453181	0.303373	0.334521	0.369207	0.313598
CGI_10018143	XPO5	0.111084	0.103234	0.160177	0.133509	0.111162	0.193401	0.144762	0.133783	0.128601	0.124374	0.110395	0.0923489	0.131201	0.142616	0.142005	0.0905487	0.129573	0.15046	0.129732	0.249968	0.182927	0.182097	0.172281	0.273341	0.150692	0.168139	0.131256	0.102691	0.159511	0.181677	0.110491	0.114723	0.100248	0.0964155	0.120475	0.131022	0.167691	0.140794	0.182765	0.15343	0.25714	0.162513	0.154541	0.103992	0.0957956	0.147567	0.134892	0.130688
CGI_10020105	RAN	11.8671	7.6503	10.1008	8.65678	9.12802	10.6996	9.90657	8.94258	8.91518	9.7043	7.93246	7.7398	8.88453	10.3599	11.265	7.733	7.96356	10.3169	10.0985	11.3557	9.27151	7.9852	8.77576	13.7384	9.55705	8.9309	9.9088	10.1928	9.88235	9.12708	8.63522	8.74105	7.69017	6.90106	7.19975	6.74087	9.10696	10.2098	10.0762	10.2896	12.3816	10.3328	9.40236	10.2881	9.94806	9.20601	11.9313	10.0526
CGI_10010714	DDX6	0.75289	0.588613	0.615286	0.64567	0.59096	0.930176	0.852306	0.688543	0.672493	0.658255	0.559923	0.448369	0.71652	0.869247	0.762528	0.910918	0.975865	0.794865	0.785764	0.667079	0.716	0.855632	1.08747	1.1667	0.834733	0.734596	0.854822	0.858948	0.713935	1.01826	0.789668	0.913768	0.65094	0.640684	0.645381	0.66881	1.04774	0.868679	0.994417	0.830969	0.818122	0.84573	0.857871	0.616316	0.679332	0.703701	0.761093	0.697452
CGI_10013849	ETIF5	1.506	0.970757	1.54315	1.27544	1.42613	2.03248	1.88738	1.40194	1.38489	1.32199	1.17787	0.820125	1.72545	1.89857	1.38537	2.39252	2.66219	1.84887	1.73394	1.67849	2.04646	2.70328	3.22729	4.2111	2.63398	1.62	1.95379	1.82059	1.45905	1.97655	1.82768	2.72838	2.26535	2.86057	2.23695	2.36813	2.6163	3.61749	2.79834	3.50401	2.71412	2.09489	1.71972	1.75703	1.35855	1.63269	1.45718	2.34646
CGI_10008614	DDX20	0.11273	0.162162	0.176466	0.17929	0.212944	0.33926	0.260134	0.206249	0.142811	0.142506	0.21116	0.165422	0.179834	0.227264	0.222348	0.193729	0.244279	0.307203	0.234297	0.278889	0.229679	0.264991	0.30456	0.226931	0.170069	0.290528	0.368632	0.302271	0.261042	0.274147	0.13878	0.347437	0.167735	0.223497	0.173874	0.154463	0.329565	0.607467	0.360671	0.252677	0.3185	0.286553	0.272205	0.233983	0.248784	0.25496	0.203459	0.317232
CGI_10014214	PAN3	0.347302	0.298405	0.412288	0.302763	0.292946	0.403971	0.395738	0.294974	0.276742	0.31495	0.354542	0.208006	0.294987	0.338871	0.333095	0.373764	0.596692	0.496143	0.418536	0.414667	0.493371	0.448324	0.598026	0.332138	0.365509	0.348138	0.420562	0.390167	0.37172	0.485197	0.332053	0.598875	0.39535	0.408968	0.322253	0.420922	0.565613	0.500775	0.461699	0.366773	0.342475	0.426911	0.461502	0.324422	0.341028	0.368393	0.428016	0.411984
CGI_10002216	CNOT9	0.419089	0.396654	0.563333	0.536517	0.43516	0.643595	0.591214	0.595289	0.478525	0.553718	0.930235	0.47276	0.541463	0.585691	0.635908	0.414139	0.587303	0.591947	0.433693	0.603942	0.61458	0.540484	0.589959	0.7604	0.61908	0.424648	0.577106	0.505187	0.555455	0.447257	0.478601	0.476574	0.307494	0.413752	0.341402	0.366566	0.530271	0.58794	0.601737	0.425904	0.529621	0.497886	0.5984	0.51947	0.451033	0.470534	0.45386	0.539442
CGI_10003120	PRMT5	0.185725	0.109105	0.107977	0.130126	0.151163	0.202793	0.182354	0.142145	0.0772082	0.135935	0.0831879	0.0467154	0.163909	0.171251	0.17424	0.136827	0.357577	0.191295	0.115967	0.131026	0.177732	0.301806	0.287416	0.196046	0.154177	0.115742	0.186498	0.158097	0.152811	0.255925	0.179128	0.187836	0.143317	0.107455	0.149035	0.145403	0.202888	0.269702	0.249212	0.214255	0.298387	0.178963	0.148041	0.136151	0.132267	0.173562	0.160341	0.153569
CGI_10014261	CNOT2	0.934664	0.893995	0.868015	0.895999	0.734252	1.85976	1.33553	1.2771	1.04196	1.25591	1.07001	0.967352	1.27771	1.22698	1.05142	2.27906	2.71101	1.9362	1.38576	1.13266	1.75258	1.51101	2.26	2.15832	1.2896	1.42814	1.57794	1.23592	1.29954	1.7349	1.40264	1.70523	1.23304	1.01457	1.01775	1.24431	1.46559	1.01768	1.63359	1.13731	0.971634	1.4857	1.12251	0.966736	0.858964	1.0868	1.18739	0.997322
CGI_10014473	DDX5	3.76423	2.56823	3.16158	3.59099	4.3778	2.80491	2.96017	2.33772	1.82375	2.6576	2.43978	1.76014	2.42066	3.26998	3.34487	5.86217	5.62703	5.60426	4.22847	5.2386	3.9273	4.37885	5.20105	5.54758	5.15268	4.90157	5.67097	7.01358	6.16901	3.95201	3.31322	4.16568	3.5541	3.51499	4.89627	3.10205	4.47036	2.70976	4.54039	2.43612	2.53175	3.52182	4.89505	4.0307	4.76101	4.81983	6.52981	3.02669
CGI_10006721	PAN2	0.476717	0.381922	0.464981	0.392296	0.352894	0.717405	0.579459	0.459299	0.389949	0.440906	0.440739	0.386902	0.432925	0.567532	0.513684	1.01917	1.09996	0.721362	0.63281	0.547458	0.695221	0.730116	1.1379	0.57063	0.654348	0.533873	0.60119	0.644719	0.613822	0.878875	0.5266	0.963699	0.590816	0.661415	0.670658	0.607093	1.05691	0.56346	0.897247	0.548466	0.514394	0.634131	0.691789	0.470677	0.43635	0.642652	0.698328	0.577262
CGI_10007973	CNOT1	0	0.155073	0.135743	0.126969	0.238066	0.093766	0.0444265	0	0.0384857	0.0663245	0.11172	0	0.134508	0.235505	0.0628826	0.102354	0.122374	0.413374	0.239303	0.347457	0.185029	0.246955	0.350614	0.0936461	0.0656579	0.24152	0.272447	0.284721	0.200742	0.163455	0.216924	0.239996	0.146262	0.0938395	0.0514291	0.180282	0.274589	0.173623	0.0601594	0.0980752	0.0841984	0.123112	0.165021	0.0953675	0.24168	0.158464	0.467969	0.164336
CGI_10017224	CNOT6	1.40337	1.13203	1.89596	1.02319	0.867086	1.4351	1.40948	1.31136	1.36026	1.13579	1.45308	1.24705	1.21927	1.47589	1.16107	0.956369	1.47538	1.40519	1.16189	1.23599	1.33441	1.21377	1.4996	1.78968	1.74976	1.18557	1.34297	1.40678	1.19672	1.15873	1.13946	2.23768	1.81723	2.2465	1.88942	1.91629	1.64273	1.47968	1.60916	1.36276	1.48126	1.33658	1.44221	1.19123	1.14469	1.42394	1.3687	1.16421
CGI_10018194	tudor	0.0835325	0.0690075	0.0731778	0.121556	0.0911077	0.134853	0.143122	0.0737434	0.0633533	0.0898118	0.0617589	0.035307	0.0810969	0.117473	0.116241	0.0401389	0.114706	0.12329	0.101923	0.1203	0.064315	0.150594	0.136985	0.0622656	0.0862892	0.100362	0.117408	0.117775	0.118667	0.157607	0.0779118	0.0845559	0.064051	0.0679569	0.0693746	0.08312	0.127841	0.0863161	0.0868811	0.0940376	0.0852211	0.116081	0.118062	0.093889	0.111071	0.0898007	0.0977079	0.112249
CGI_10018301	tudor	0.229412	0.125277	0.136483	0.151551	0.202054	0.377558	0.256444	0.200327	0.203441	0.212847	0.175886	0.158931	0.199557	0.268331	0.158611	0.463132	0.404054	0.385418	0.229152	0.241006	0.307723	0.303783	0.645593	0.271194	0.248273	0.201636	0.317002	0.284866	0.288615	0.414484	0.215765	0.304044	0.270315	0.269497	0.316344	0.201458	0.305422	0.227252	0.381534	0.269479	0.287252	0.347711	0.290246	0.217103	0.224036	0.258374	0.243281	0.217769
CGI_10018415	maelstrom	0.218985	0.212561	0.142283	0.223492	0.209817	0.266331	0.33067	0.195565	0.169455	0.306796	0.249323	0.0784818	0.192697	0.323506	0.308919	0.174132	0.41407	0.318825	0.231516	0.258522	0.180824	0.2178	0.354984	0.345021	0.264862	0.232266	0.319862	0.290812	0.303432	0.301752	0.154316	0.20121	0.269088	0.121439	0.125181	0.183	0.283606	0.226686	0.23878	0.243169	0.154307	0.284298	0.229358	0.258379	0.191591	0.248133	0.237347	0.252493
CGI_10018436	tudor	0.428968	0.456357	0.470658	0.540464	0.399796	0.712269	0.621698	0.493442	0.51559	0.46707	0.547764	0.252656	0.565351	0.620472	0.708437	0.289473	0.714059	0.835071	0.637538	0.587241	0.471602	0.445976	0.562562	0.369299	0.585902	0.486038	0.834802	0.659803	0.457918	0.575899	0.270952	0.403312	0.357312	0.1905	0.164136	0.270763	0.552087	0.538273	0.535719	0.499884	0.478942	0.439381	0.596411	0.540786	0.507752	0.540117	0.564754	1.06354
CGI_10018438	tudor	0	0	0.0478803	0.0392408	0	0.0460759	0.0518082	0.0769951	0	0.0435673	0.0863179	0	0.0471636	0	0.0777791	0	0	0	0	0	0.0379706	0.0581869	0	0.0652385	0.0741613	0.0766399	0.0578009	0.0513454	0	0.0530344	0	0.0558752	0.0705543	0.0417064	0.04366	0	0	0.0486766	0	0.0554848	0.0343157	0.108784	0.0852963	0.14145	0.0589694	0.042931	0.0520845	0.071468
CGI_10018841	DCP1	0.425675	0.365308	0.451407	0.295772	0.297151	0.459879	0.545968	0.408666	0.409369	0.335517	0.398483	0.298782	0.421043	0.403125	0.290481	0.308598	0.362898	0.397197	0.329128	0.392671	0.602954	0.54592	0.492641	0.378879	0.384329	0.291962	0.37405	0.402206	0.294413	0.271427	0.224692	0.486085	0.367987	0.473981	0.376855	0.534391	0.504237	0.61341	0.479418	0.379146	0.489283	0.442167	0.592298	0.394531	0.367907	0.423796	0.390832	0.403101
CGI_10018969	DDX42	0.316567	0.388236	0.413276	0.445857	0.385671	0.748073	0.53886	0.455351	0.382962	0.470964	0.402817	0.258557	0.42925	0.570605	0.424183	0.338348	0.707799	0.709426	0.581223	0.556555	0.534433	0.442764	0.793839	0.511668	0.431446	0.629151	0.679462	0.765685	0.553135	0.551014	0.377501	0.544635	0.366637	0.318809	0.208343	0.358979	0.501619	0.433278	0.596736	0.517077	0.368382	0.576821	0.505808	0.442215	0.455888	0.532108	0.536536	0.546306
CGI_10019206	CNOT10	0.392526	0.37284	0.392791	0.371548	0.354511	0.58402	0.520679	0.464641	0.377989	0.523781	0.429904	0.491642	0.423738	0.521436	0.443842	0.57198	0.705921	0.510749	0.501131	0.462868	0.463316	0.477108	0.643912	0.525541	0.467272	0.447327	0.479116	0.501126	0.447224	0.704541	0.472688	0.492475	0.382588	0.518632	0.420734	0.379475	0.603427	0.426203	0.516714	0.350492	0.403721	0.547767	0.517747	0.383072	0.336054	0.465414	0.500407	0.356532
CGI_10019950	tudor	0.140721	0.109105	0.140679	0.144672	0.164209	0.277189	0.187685	0.122635	0.146601	0.136056	0.172515	0.12146	0.173587	0.260509	0.163739	0.0944445	0.222997	0.224277	0.183127	0.208148	0.156335	0.145282	0.163709	0.15905	0.134383	0.197856	0.189659	0.202046	0.165954	0.174198	0.091013	0.164356	0.131047	0.0954341	0.0647788	0.0664733	0.151111	0.2073	0.197054	0.19615	0.168851	0.232559	0.215297	0.182357	0.170395	0.198375	0.227458	0.222479
CGI_10020779	CNOT7	0.421285	0.52027	0.375268	0.481039	0.366264	0.737215	0.58684	0.428292	0.402264	0.491166	0.383555	0.246657	0.495157	0.575913	0.519911	0.239063	0.429406	0.540904	0.530331	0.618877	0.519468	0.507375	0.659207	0.461129	0.402451	0.357001	0.62121	0.536226	0.43653	0.450792	0.295531	0.469738	0.360625	0.335369	0.259772	0.448327	0.531289	0.612844	0.551581	0.474486	0.520189	0.518449	0.576115	0.479918	0.44973	0.527119	0.58216	0.583184
CGI_10021014	EIF4A2	0.289784	0.280793	0.54581	0.244804	0.259199	0.418939	0.386716	0.39055	0.608547	0.325416	0.701138	0.630805	0.348643	0.334122	0.271677	0.309188	0.231447	0.276263	0.217055	0.291652	0.54272	0.253008	0.310275	0.461129	0.375964	0.195901	0.27621	0.28298	0.224063	0.234711	0.557208	0.708397	0.680757	0.802726	0.56572	0.694403	0.821585	1.7409	0.385392	0.582851	0.554051	0.41391	0.44492	0.331076	0.354645	0.281349	0.250533	0.377394
CGI_10021647	PABP	8.14173	4.90806	4.32477	4.17227	3.82275	4.74332	4.86874	3.81851	3.85058	3.87955	3.59068	3.62865	4.43865	4.85831	4.35258	3.57532	3.90346	4.38157	4.037	4.43954	3.81623	3.23561	3.53925	3.10519	3.84552	3.06077	3.92294	4.34318	4.65056	3.83683	2.67949	3.43811	2.92353	2.95515	2.94798	2.98518	3.48952	3.68796	4.04897	3.52055	3.36146	3.53628	4.64765	3.50248	3.48204	3.5189	4.10307	3.5162
CGI_10023437	tudor	0.176066	0.162162	0.133522	0.188762	0.181029	0.301254	0.273121	0.182094	0.121378	0.179502	0.122193	0.0674668	0.201885	0.23341	0.20794	0.174722	0.252886	0.222235	0.231516	0.233539	0.208158	0.24819	0.312964	0.206451	0.180664	0.182606	0.209077	0.240627	0.19984	0.24423	0.160113	0.216219	0.150434	0.110522	0.120475	0.117885	0.277352	0.16485	0.256642	0.182084	0.183509	0.238662	0.25297	0.175333	0.178566	0.239075	0.23616	0.205656
CGI_10023438	tudor	0.0871548	0.0675675	0.0813224	0.0909982	0.0624276	0.128543	0.142712	0.0909308	0.0382488	0.064499	0.0445434	0	0.0776669	0.0845082	0.0895009	0.067882	0.100466	0.0694191	0.0994198	0.0950448	0.0907832	0.0803004	0.122026	0.0612746	0.0719309	0.0746848	0.0985928	0.0860108	0.0694479	0.056842	0.0393037	0.0943637	0.0564434	0.0446504	0.0435506	0.060698	0.132059	0.0682038	0.123177	0.0734587	0.0662452	0.0891499	0.121909	0.0730658	0.0832439	0.115139	0.127244	0.111442
CGI_10023793	CNOT1	0.817433	0.704363	0.766578	0.647248	0.551714	0.952333	1.01908	0.787022	0.694518	0.750257	0.735809	0.54475	0.777281	0.831672	0.708925	0.66182	1.01483	0.862556	0.744466	0.788193	0.740241	0.769896	0.981079	0.895832	1.09723	0.746718	0.765561	0.825443	0.747177	0.786677	0.501093	0.927885	0.696708	0.645836	0.834903	0.73585	1.07436	1.29007	1.07515	0.922532	1.12015	0.898132	0.930432	0.603994	0.679687	0.827899	0.849307	0.891129
CGI_10023876	tudor	0.132708	0.102016	0.103658	0.115918	0.114828	0.203967	0.165677	0.112764	0.111194	0.138247	0.0913742	0.0634346	0.134263	0.174185	0.180467	0.0973959	0.130825	0.217053	0.160601	0.179499	0.111562	0.107973	0.22405	0.109006	0.173415	0.177523	0.152029	0.176808	0.141602	0.185348	0.0849841	0.170895	0.0938679	0.0955568	0.0864447	0.109619	0.156492	0.163293	0.173334	0.133763	0.0811305	0.15442	0.163827	0.1104	0.121017	0.183934	0.157308	0.171873
CGI_10024925	tudor	0.300871	0.228843	0.193619	0.288781	0.230842	0.406613	0.382752	0.230172	0.203678	0.243514	0.232709	0.079957	0.270731	0.382173	0.282545	0.135528	0.281524	0.251919	0.264609	0.354789	0.21459	0.290193	0.248085	0.20579	0.196137	0.214149	0.23015	0.300095	0.259624	0.278227	0.158374	0.212504	0.156447	0.136282	0.142032	0.129436	0.298441	0.189895	0.243353	0.242779	0.229529	0.285624	0.367716	0.196403	0.249258	0.308263	0.305518	0.279815
CGI_10025028	tudor	0.134903	0.536774	0.886031	1.00617	0.925309	1.48455	1.48576	0.929864	0.790081	1.15624	1.04147	0.738791	1.03343	1.26385	0.991348	0.573987	1.07805	1.03375	0.941498	1.39824	0.934423	0.898006	1.11991	1.73022	0.911822	1.35593	1.56168	1.20966	1.39205	0.92239	0.714771	0.578814	0.680634	0.506978	0.516699	0.519556	0.909431	0.875047	1.10045	0.994558	0.740969	1.12989	1.07834	1.33983	0.961627	1.3134	1.06331	0.885342
CGI_10026535	tudor-11	0.385281	0.523371	0.637869	0.494796	0.463517	0.793122	0.828384	0.68622	0.391133	0.491288	0.384277	0.27744	0.539993	0.714758	0.599522	0.330084	0.485429	0.394841	0.38725	0.496405	0.462945	0.569515	0.73249	0.355426	0.61211	0.358956	0.432905	0.461384	0.560093	0.520689	0.382602	0.51536	0.461732	0.568434	0.583885	0.582066	0.651276	1.17772	0.649751	0.657612	0.703244	0.542461	0.64085	0.329104	0.447599	0.486945	0.461113	0.564207
CGI_10026608	CNOT3	1.02489	1.15983	1.43665	1.1894	1.06192	2.12213	1.95996	1.37871	1.42764	1.43297	1.43273	1.03443	1.64301	1.75833	1.40088	1.07549	1.78084	1.84982	1.56374	1.52262	1.65277	1.42737	1.5707	2.09705	1.51139	1.39855	1.89689	1.44841	1.31023	1.48959	1.11465	1.49838	1.1166	1.0591	0.996412	1.10898	1.78628	1.74175	1.8115	1.69606	1.66113	1.76097	1.5677	1.4623	1.39999	1.5597	1.68569	1.6688
CGI_10028774	GW182	1.28658	1.39001	1.36187	1.31976	1.11928	1.86475	1.65103	1.32727	1.26245	1.50307	1.52953	0.882183	1.47763	1.50229	1.40576	1.54263	2.1741	1.95724	1.75076	1.66831	1.62272	1.47222	2.0341	1.36175	1.3869	1.35006	1.74411	1.83088	1.32209	1.798	0.928449	1.83749	1.3355	1.25818	1.20366	1.31055	1.96808	1.46836	1.82908	1.52245	1.43262	1.7834	1.88368	1.4777	1.57666	1.65777	1.87768	1.72506
CGI_10028859	tudor	0.0940701	0.101462	0.065897	0.172524	0.0900295	0.147619	0.120293	0.0996407	0.0757872	0.113056	0.093782	0	0.0859971	0.151975	0.122713	0.0885418	0.147882	0.151246	0.164077	0.131433	0.119849	0.14207	0.188585	0.0972796	0.108872	0.119652	0.121623	0.143883	0.0806575	0.17243	0.0715351	0.120072	0.0842971	0.0842715	0.0532893	0.0861775	0.123041	0.126927	0.143182	0.11631	0.0943113	0.128684	0.132786	0.0911783	0.105505	0.109888	0.138452	0.168105
[truncated: 75 more columns]
